# Supplementary material
Source: publisher figshare collection journal article supplement (https://rs.figshare.com/ndownloader/files/13198760)
Supplement: Supplementary file 1 [file 13198760]

Species:	Taxonomic authority	Herbarium	Collector Name:	Collector Number:	Lat (Dec Degrees)	Long (Dec Degrees)	Country	GenBank Number
Andropogon abyssinicus	R. Br. ex Friesen	MO	Cornelius Jacobus Pieter Seegeler	2904	9.4	41.566667	Ethiopia	MH181187
Andropogon abyssinicus	R. Br. ex Friesen	MO	Jan Jacobus Friedrich Egmond de Wilde	8200	9.105584	38.757889	Ethiopia
Andropogon abyssinicus	R. Br. ex Friesen	MO	J. W. Ash	1281	8.314097	39.516792	Ethiopia	MH181184
Andropogon abyssinicus	R. Br. ex Friesen	MO	Pasquet	1097	-0.97	36.63	Kenya	NC_035030
Andropogon aequatoriensis	Hitchc.	MO	I. Grignon	84272	-4.009478	-79.221683	Ecuador
Andropogon aequatoriensis	Hitchc.	MO	Simon Laegard	18721	-3.987132	-79.238763	Ecuador
Andropogon aequatoriensis	Hitchc.	MO	Simon Laegard	18453	-4.005948	-79.182651	Ecuador	MH181218
Andropogon africanus	Franch.	MO	Jacques - Georges Adam	24706	7.63737	-8.41831	Guinea
Andropogon africanus	Franch.	MO	Jacques - Georges Adam	6690	7.973727	-6.668057	Cote d' Ivoire
Andropogon africanus	Franch.	MO	Jacques - Georges Adam	26650	7.586283	-8.536763	Liberia
Andropogon amethystinus	Steud.	MO	Eleanor Phillips	681	-10.358161	33.560434	Malawi
Andropogon amethystinus	Steud.	MO	Roy Emile Gerau	4531	-8.966667	33.65	Tanzania
Andropogon amethystinus	Steud.	MO	Jan Jacobus Friedrich Egmond de Wilde	9787	9.74972	39.501343	Ethiopia
Andropogon amethystinus	Steud.	MO	R. Pasquet	1145	-9.36	34.59	Tanzania
Andropogon amethystinus	Steud.	MO	R. Pasquet	1249	-0.77	36.74	Kenya
Andropogon angustatus	(J. Presl) Steud.	MO	Tim Killeen	2459	-16.216	-62	Bolivia
Andropogon angustatus	(J. Presl) Steud.	MO	M.H. Grayum	12275	10.969327	-85.653032	Costa Rica
Andropogon angustatus	(J. Presl) Steud.	MO	E. L. Ekman	1001	20.925951	-76.309533	Cuba
Andropogon appendiculatus	Nees	K	Jacot Guillarmod	164	-29.522815	29.029455	Lesotho	MH181173
Andropogon appendiculatus	Nees	K	G. Davidse, B. Simon, G. Pope	6551	-18.314193	32.77186	Zimbabwe
Andropogon appendiculatus	Nees	K	D.B. Muller	812	-28.31139	27.239801	South Africa
Andropogon arctatus	Chapm.	MO	Sidney McDaniel	24725	30.689444	-84.955225	USA
Andropogon arctatus	Chapm.	MO	Robert K. Godfrey	75788	30.365511	-84.778749	USA
Andropogon arctatus	Chapm.	MO	Robert K. Godfrey	81959	30.068244	-85.034696	USA
Andropogon arenarius	Hack.	K	A. Brasolin & Dardano	616	-27.599386	-48.474735	Brazil
Andropogon arenarius	Hack.	K	G.A. norrmann	139	-28.32947879	-48.7784354	Brazil
Andropogon arenarius	Hack.	K	A. Burkart	21530	-34.502397	-54.33203	Uruguay
Andropogon ascinodis	C. B. Clarke	MO	Peter Andreas	7728	10.333333	0.566667	Togo
Andropogon ascinodis	C. B. Clarke	MO	Laurent Vincent Gautier	2159	9.566667	-4.15	Cote d' Ivoire	MH181188
Andropogon ascinodis	C. B. Clarke	MO	Richard D. noyes	1120	5.715	-0.201667	Ghana
Andropogon auriculatus	Stapf	MO	Roy Emile Gerau	5610	4.03	10.026667	Cameroon
Andropogon auriculatus	Stapf	MO	Jan Jacobus Friedrich Egmond de Wilde	8417	2.816548	9.906295	Cameroon
Andropogon auriculatus	Stapf	MO	R. N. Hale	76	4.411982	-7.702494	Liberia
Andropogon auriculatus	Stapf	MO	R. Pasquet	LeRu2 (in db as LeRu1)	3.471667	11.620556	Cameroon
Andropogon bicornis	L.	MO	Gerrit Davidse	19905	10.074524	-64.068059	Venezuela
Andropogon bicornis	L.	MO	M. Nee	10161	8.211697	-81.493918	Panama
Andropogon bicornis	L.	MO	A. Reyes - Garcia	2284	16.333333	-91.216667	Mexico
Andropogon bourgaei	Hack.	MO	L.H. Liebman	73	15.827444	-95.975032	Mexico
Andropogon bourgaei	Hack.	MO	Geritt Davidse	20315	17.952276	-91.793609	Mexico
Andropogon bourgaei	Hack.	MO	Geritt Davidse	32098	16.566667	-88.816667	Belize
Andropogon brachystachyus	Chapm.	MO	Robert K. Godfrey	78246	30.339449	-83.987615	USA	MH181200
Andropogon brachystachyus	Chapm.	MO	Robert Kral	61301	27.239967	-81.256272	USA
Andropogon brachystachyus	Chapm.	MO	Robert K. Godfrey	74680	30.497167	-81.903402	USA
Andropogon brazzae	Franch.	MO	Stephen Andrew Renvoize	5729	-12.853676	28.63376	Zambia	MH181212
Andropogon brazzae	Franch.	MO	G. Cordeaue (in db as Conteaux)	564	1.21497	16.507494	Democratic Republic of Congo	MH181236
Andropogon brazzae	Franch.	MO	Stephen Andrew Renvoize	5670	-11.814539	29.567324	Zambia
Andropogon burmanicus	Bor	BKF	Arthan	71			Ubon Ratchathani, Thailand	NC_035038
Andropogon canaliculatus	Schumach.	MO	S. R. Semsei	4280	-5.182461	38.458465	Tanzania
Andropogon canaliculatus	Schumach.	MO	Protase K. Rwaburindore	4575	-0.416667	30.483333	Uganda
Andropogon canaliculatus	Schumach.	MO	Protase K. Rwaburindore	5262	-0.366667	30.483333	Uganda
Andropogon canaliculatus	Schumach.	MO	Pasquet	1160	-9.73	30.73	Zambia	MH181224
Andropogon carinatus	Nees	MO	M. Aparecida de Silva	2370	-13.950253	-47.528214	Brazil
Andropogon carinatus	Nees	MO	T.J. Killeen	7723	-14.802991	-60.363664	Bolivia
Andropogon carinatus	Nees	MO	Otto Huber	5734	5.766303	-67.336578	Venezuela
Andropogon chevalieri	Reznik	MO	Constant Vanden Berghen	7961	12.389824	-16.570257	Senegal
Andropogon chevalieri	Reznik	MO	Jacques - Georges Adam	15038	12.634053	-7.969764	Mali
Andropogon chevalieri	Reznik	MO	Jacques - Georges Adam	15600	13.073385	-12.719035	Senegal
Andropogon chinensis	(Nees) Merr.	MO	Kai Larsen	44514	19.333333	-100.783333	Thailand
Andropogon chinensis	(Nees) Merr.	MO	P. A. Smith	3370	-20.011667	21.3625	Botswana
Andropogon chinensis	(Nees) Merr.	MO	Bruce Hulberg	317	8.485666	21.23477	Central African Republic
Andropogon chinensis	(Nees) Merr.	MO	R. Pasquet	1232	-9.6075	31.026111	Zambia
Andropogon chinensis	(Nees) Merr.		R. Pasquet	1137	13.24	24.65	unknown
Andropogon chrysostachyus	Steud.	MO	Jan Jacobus Friedrich	5883	9.433333	42.35	Ethiopia
Andropogon chrysostachyus	Steud.	MO	Yahya Shaaban Abeid	2801	9.095	33.938333	Tanzania
Andropogon chrysostachyus	Steud.	MO	Yahya Shaaban Abeid	2831	9.136667	33.66	Tanzania	MH181198
Andropogon chrysostachyus	Steud.	MO	R. Pasquet	1273	0.045	36.263333	Kenya	MH181181
Andropogon cordatus	Swallen	MO	M. Nee	39128	-17.802697	-63.654838	Bolivia
Andropogon cordatus	Swallen	MO	J.C. Solomon	12936	-16.059622	-68.017965	Bolivia
Andropogon cordatus	Swallen	MO	Thomas B. Croat	51290	-16.917923	-65.478172	Bolivia
Andropogon crossotos	Cope	K	J.R.I. Wood	1610	16.223785	43.965163	Yemen
Andropogon crossotos	Cope	K	A. Radcliffe-Smith, S.J. Henchie	4780	16.222236	44.003167	Yemen Arab Republic	MH181194
Andropogon crossotos	Cope	K	E. Bisset	177	14.36666667	44.43333333	Yemen Arab Republic
Andropogon curvifolius	Clayton	K	E.J. Adjanohoun	n/a	6.294228	-5.351635	Cote d'Ivoire
Andropogon curvifolius	Clayton	K	R Rose Innes	n/a	6.580022	-1.239955	Ghana
Andropogon curvifolius	Clayton	K	E.J. Adjanohoun	n/a	6.2942	-5.351635	Cote d'Ivoire
Andropogon distachyos	L.	MO	P. Aellen	100	34.023136	35.665594	Lebanon
Andropogon distachyos	L.	MO	Jan Jacobus Friedrich Egmond de Wilde	6539	7.15	38.716667	Ethiopia	MH181203
Andropogon distachyos	L.	MO	Lenar B. Mwasumbi	16166	-8.983333	33.65	Tanzania
Andropogon diuturnus	Sohns	MO	Julian Steyermark	126442	3.677169	-65.750427	Venezuela
Andropogon diuturnus	Sohns	MO	Bruce K. Holst	3348	5.651348	-66.203356	Venezuela
Andropogon diuturnus	Sohns	MO	Otto Huber	12978	4.808333	-64.533333	Venezuela
Andropogon dummeri	Stapf	MO	Protase K. Rwaburindore	2853	0.333333	30.433333	Uganda
Andropogon dummeri	Stapf	MO	Harold F. Heady	1377	-4.258881	39.387783	Kenya
Andropogon dummeri	Stapf	MO	Jacques Lambinon	75/154	-2.901021	29.119851	Burundi
Andropogon durifolius	Renvoize	MO	S. A. Mori	12550	-13.006808	-41.408367	Brazil
Andropogon durifolius	Renvoize	MO	W. R. Anderson	35221	-18.306127	-43.516047	Brazil
Andropogon durifolius	Renvoize	MO	S.A. Mori	14365	-12.467776	-41.466731	Brazil
Andropogon eucomus	Nees	MO	Jean Pawek	7550	-11.422656	33.96077	Malawi
Andropogon eucomus	Nees	MO	Simon Laegaard	15795	-17.838308	30.916418	Zimbabwe
Andropogon eucomus	Nees	MO	Richard Razakamalala	2628	-24.586667	47.253333	Madagascar
Andropogon eucomus	Nees	MO	R. Pasquet	1265	-13.153611	30.703056	Zambia
Andropogon eucomus	Nees	MO	R. Pasquet	1269	-13.078056	30.634167	Zambia
Andropogon eucomus	Nees	MO	R. Pasquet	1163	-9.51	30.59	Zambia
Andropogon eucomus	Nees	MO	R. Pasquet	1208	-15.44	23.21	Zambia
Andropogon exaratus	Hack.	MO	E. Zardini	10361	-26.055285	-56.83827	Paraguay
Andropogon exaratus	Hack.	MO	E. Zardini	26545	-25.249768	-57.123442	Paraguay
Andropogon exaratus	Hack.	MO	E. Hassler	12485	-25.411397	-57.288319	Paraguay
Andropogon fastigiatus	Sw.	MO	R. Liesner	11414	7.466667	-63.283333	Venezuela
Andropogon fastigiatus	Sw.	MO	T. Zanoni	17875	19.516667	-71.683333	Dominican Republic
Andropogon fastigiatus	Sw.	MO	P. A. Smith	2071	-18.591667	24.078333	Botswana
Andropogon fastigiatus	Sw.	MO	R. Pasquet	1231	-9.6076	31.026111	Zambia	MH181193
Andropogon fastigiatus	Sw.	MO	Traiperm et al.	585	15.458611	105.5775	Thailand
Andropogon festuciformis	Rendle	MO	Duncan W. Thomas	8687	-2.633333	15.383333	Congo
Andropogon festuciformis	Rendle	MO	Gretchen Marie Walters	990	-2.141667	14.833333	Gabon
Andropogon festuciformis	Rendle	MO	John M. Fay	5832	8.50001	21.216667	Central African Republic
Andropogon festuciformis	Rendle	MO	R. Pasquet	1259	-11.684722	24.143889	Zambia
Andropogon festuciformis	Rendle	MO	R. Pasquet	1261	-11.504444	24.379444	Zambia
Andropogon floridanus	Scribn.	MO	Robert Kral	57035	27.335529	-81.374543	USA
Andropogon floridanus	Scribn.	MO	Robert K. Godfrey	79233	30.415796	-85.594364	USA	MH181221
Andropogon floridanus	Scribn.	MO	Robert Kral	61207	29.595763	-83.025526	USA
Andropogon gabonensis	Stapf	MO	Chris Wilks	2178	-0.412976	9.501373	Gabon
Andropogon gabonensis	Stapf	MO	Jan Jacobus Friedrich Egmond de Wilde	9595	-2.55116	11.591992	Gabon
Andropogon gabonensis	Stapf	MO	Chris Wilks	2373	0.06639	10.211835	Gabon
Andropogon gayanus	Kunth	MO	Fagbemi Oyayomi	OFOOA:144	9.029661	7.449171	Nigeria
Andropogon gayanus	Kunth	MO	N. A. Mwangulango	799	-6.939037	31.185508	Tanzania	MH181211
Andropogon gayanus	Kunth	MO	D. N. Smith	8342	-10.190594	-75.215149	Peru
Andropogon gayanus	Kunth	MO	R. Pasquet	1153	-10.11	30.92	Zambia	MH181174
Andropogon gayanus	Kunth	MO	R. Pasquet	1174	-8.88	31.26	Zambia
Andropogon gerardi	Vitman	MO	norlan C. Henderson	95687	37.98644	-94.653136	USA	MH181222
Andropogon hondurensis	(R. W. Pohl) Wipff	MO	Richard W. Pohl	12138	14.313401	-87.445177	Honduras	MH181178
Andropogon gerardi	Vitman	MO	Peter H. Raven	27936	38.166667	-90.716667	USA
Andropogon gerardi	Vitman	MO	C. McAllister	803	38.16897	-95.27483	USA	MH181165
Andropogon glaucescens	Kunth	MO	S. Laegaard	54438	0.558333	-77.833333	Ecuador	MH181185
Andropogon glaucescens	Kunth	MO	Paul C. Hutchison	5275	-6.882564	-78.135967	Peru
Andropogon glaucescens	Kunth	MO	A. Gentry	35766	-11.127424	-75.66363	Peru
Andropogon glaziovii	Hack.	MO	Tim Killeen	2031	-16.083333	-62.133333	Bolivia
Andropogon glaziovii	Hack.	MO	Tim Killeen	2082	-16.1667	-62.000072	Bolivia
Andropogon glaziovii	Hack.	MO	Tim Killeen	983	-16.166667	-62.000072	Bolivia
Andropogon glomeratus	(Walter) Britton, Sterns & Poggenb.	MO	Wanda L. Rockett	19	32.591662	-92.659161	USA
Andropogon glomeratus	(Walter) Britton, Sterns & Poggenb.	MO	William Haber	9741	10.301451	-84.805096	Costa Rica
Andropogon glomeratus	(Walter) Britton, Sterns & Poggenb.	MO	R. Callejas	2255	6.850505	-75.825597	Colombia
Schizachyrium gracile	(Spreng.) Nash	MO	W.E. Harmon	2795	16.640447	-89.896982	Guatemala	MH181191
Schizachyrium gracile	(Spreng.) Nash	MO	Peter H. Raven	28209	21.94525	-72.02417	Turks and Caicos	MH181197
Schizachyrium gracile	(Spreng.) Nash	MO	G. N. Avery	2186	24.665253	-81.409642	USA
Andropogon greenwayi	Napper	MO	A. S. McKinnon	S.244	10.627541	47.362661	Somalia
Andropogon greenwayi	Napper	MO	Percy James Greenway	10330	-2.388546	34.824997	Tanzania	MH181176
Andropogon greenwayi	Napper	MO	Glover	1026	3.32271	44.259121	Somalia
Andropogon greenwayi	Napper	K	P.E. Glover & Gilliland	1026	8.080522	49.656335	Somalia	MH181177
Andropogon gyrans	Ashe	MO	R.A. Evers	21860	37.625795	-88.469925	USA	MH181171
Andropogon gyrans	Ashe	MO	D. E. Breedlove	55215	16.952559	-92.075378	Mexico
Andropogon gyrans	Ashe	MO	K. Shea	299	38.464652	-90.809093	USA
Andropogon hallii	Hack.	MO	W. K. W. Baldwin	10782	49.716667	-99.250001	Canada
Andropogon hallii	Hack.	MO	George W. Letterman	OO266	37.975202	-100.901134	USA
Andropogon hallii	Hack.	MO	R. B. Livingston	383	38.82855	-104.53972	USA
Andropogon heterantherus	Stapf	K	A. Bogdan	AB 3310	-3.94458	39.680103	Kenya	MH181186
Andropogon heterantherus	Stapf	K	Helen Fauckon	3561	-5.133355	39.018389	Tanzania
Andropogon heterantherus	Stapf	K	R. Wingfield	3156	-6.783646	39.20973	Tanzania
Andropogon huillensis	Rendle	MO	Petrus Cornelis Vermuelen du Toit	2528 CB	-25.537659	28.438389	South Africa
Andropogon huillensis	Rendle	MO	Richard Razakamalala	5199	-21.325	45.163333	Madagascar	MH181180
Andropogon huillensis	Rendle	MO	P. A . Smith	3578	-18.045	23.305	Botswana
Andropogon hypogynus	Hack.	MO	Gerrit Davidse	16073	6.883333	-69.608333	Venezuela
Andropogon hypogynus	Hack.	MO	D. Alvarenga	1139	-15.258333	-45.785	Brazil
Andropogon hypogynus	Hack.	MO	Howard Samuel Irwin	12067	-15.578932	-47.864829	Brazil
Andropogon indetonsus	Sohns	MO	Otto Huber	11244	5.916667	-62.633333	Venezuela
Andropogon indetonsus	Sohns	MO	Gerrit Davidse	22696	5.733333	-62.533333	Venezuela
Andropogon indetonsus	Sohns	MO	Julian A. Steyermark	113449	5.74001	-63.696667	Venezuela
Andropogon ingratus	Hack.	K	S. Atkings, C.M. Sakuragui, R.M. P.T. Sano, V.C. Souza	14786	-13.545715	-41.974124	Brazil	MH181172
Andropogon ingratus	Hack.	K	A.M. Giulietti, N.L. Menezes, I. Cordeiro, M.G. Saho, N.M. Castro, J. Diacui	SPF 20154 or CFSC 7329	-19.399348	-43.757144	Brazil
Andropogon ingratus	Hack.	K	G. Davidse, T.P. Ramamoorthy, D.M. Vital	11712	-11.992406	-38.390661	Brazil
Andropogon insolitus	Sohns	MO	Gerrit Davidse	15710	6.685067	-67.454681	Venezuela
Andropogon insolitus	Sohns	MO	Raymond M. Harley	15771	-13.333333	-41.216667	Brazil	MH181163
Andropogon insolitus	Sohns	MO	Otto Huber	7401	5.583333	-61.5	Venezuela
Andropogon ivorensis	Adjan. & Clayton	K	H. Jacques-Felix	8602	7.358733	13.583511	Cameroon
Andropogon ivorensis	Adjan. & Clayton	K	Ake Assi	11287	8.12234	-5.110669	Cote d'Ivoire
Andropogon ivorensis	Adjan. & Clayton	K	G. Boudet	3319	9.866666667	-6.433333333	Cote d'Ivoire
Andropogon kelleri	Hack.	K	J.J. Beckett	1334	9.533333333	49.11666667	Somalia
Andropogon kelleri	Hack.	K	C.F. Hemming	2168	8.45	46.23333333	Somalia
Andropogon kelleri	Hack.	K	M.G. & S.B. Gilbert	2064	7.66151	44.815079	Ethiopia
Andropogon lateralis	Nees	MO	Elsa Mtilde Zardini	24713	-25.366667	-55.916667	Paraguay
Andropogon lateralis	Nees	MO	Osvaldo N. Morrone	116	-25.583333	-57	Paraguay
Andropogon lateralis	Nees	MO	Jason R. Swallen	7753	-28.22216	-52.416081	Brazil
Andropogon laxatus	Stapf	MO	Petrus Cornelis Vermuelen du Toit	2430 DD	-24.944784	30.846357	South Africa
Andropogon laxatus	Stapf	MO	Franciscus Josefus Breteler	6785	-1.65	13.283333	Gabon	MH181206
Andropogon laxatus	Stapf	MO	Canisius J. Kayombo	2	-8.516	35.166666	Tanzania	MH181182
Andropogon leprodes	Cope	K	P.e. Glover & Gilliland	1067	9.130711	47.570731	Somalia	MH181210
Andropogon leprodes	Cope	K	A.S. McKinnon	S. 244 or 5.244	10.621158	47.36298	Somalia
Andropogon leucostachyus	Kunth	MO	Gerrit Davidse	19913	10.108364	-64.106546	Venezuela
Andropogon leucostachyus	Kunth	MO	K. M. Redden	2911	6.391667	-60.7455	Guianas
Andropogon leucostachyus	Kunth	MO	F. W. Gould	15829	18.211857	-67.13469	Puerto Rico
Andropogon liebmannii	Hack.	MO	Jese C. Soto nunez	2357	19.742379	-100.598713	Mexico	MH181232
Andropogon liebmannii	Hack.	MO	G.& J. Davidse	9839	19.702305	-100.732608	Mexico
Andropogon liebmannii	Hack.	MO	George B. Hinton	1413	19.066667	-100.114667	Mexico
Andropogon ligulatus	(Stapf) Clayton	MO	Wright Matafawii	13	-8.837346	31.378627	Zambia
Andropogon ligulatus	(Stapf) Clayton	MO	O. B. Miller	7053	-20.415937	28.474321	Zimbabwe
Andropogon ligulatus	(Stapf) Clayton	MO	M. McCallum Webster	A 128	-8.817812	31.448112	Zambia
Andropogon ligulatus	(Stapf) Clayton	MO	R. Pasquet	1266	-13.156111	30.703056	Zambia
Andropogon ligulatus	(Stapf) Clayton	MO	R. Pasquet	1270	-10.179167	30.964167	Zambia	MH181204
Andropogon lima	(Hack.) Stapf	K	H.G. Mooney	7181	6.816666667	39.7	Ethiopia
Andropogon lima	(Hack.) Stapf	K	L. Zapfack	1125	6.197044	10.517652	Cameroon
Andropogon lima	(Hack.) Stapf	K	Katende	911	1.203874	24.495636	Uganda
Andropogon lima	(Hack.) Stapf	MO	R. Pasquet	1275	-0.45416667	36.71361111	Kenya
Andropogon lindmanii	Hack.	K	Rosengurtt	B-6158b	-24.765351	-55.66569	Uruguay
Andropogon lindmanii	Hack.	K	Rosengurtt	B-8211	-34.64255	-55.727956	Uruguay
Andropogon lindmanii	Hack.	K	Rosengurtt	10835	-34.005887	-53.547913	Uruguay
Andropogon lividus	Thwaites	K	F.W. Gould, R. Cooray	13779	6.801234	80.789165	Sri Lanka
Andropogon lividus	Thwaites	K	T.R. Soderstrom, S. Kulatunge	1669	6.827413	80.747267	Sri Lanka
Andropogon lividus	Thwaites	K	A.G. Bourne	3127	10.265347	77.509422	India
Andropogon longiberbis	Hack.	K	C.S. Campbell	3845	30.213919	-82.879951	US
Andropogon longiberbis	Hack.	K	C.S. Campbell	4091	29.705276	-82.323163	US
Andropogon longiberbis	Hack.	K	C.S. Campbell	3764	28.350606	-80.795065	US
Andropogon macrophyllus	Stapf	MO	Jacques - Georges Adam	28112	8.652886	-8.666862	Guinea
Andropogon macrophyllus	Stapf	MO	Jacques - Georges Adam	24532	7.570458	-8.532729	Liberia
Andropogon macrophyllus	Stapf	MO	M. P. T. Alers	LOPE 100	0.125	11.625	Gabon
Andropogon macrothrix	Trin.	MO	Osvaldo N. Morrone	178	-26.033333	-56.966667	Paraguay
Andropogon macrothrix	Trin.	MO	William R. Anderson	35801	-17.769011	-43.63184	Brazil
Andropogon macrothrix	Trin.	MO	Howard Samuel Irwin	98181 (9818 in tropicos)	-17.105731	-48.013531	Brazil
Andropogon mannii	Hook. f.	MO	Roy Emile Gereau	3170	-9.05	33.916667	Tanzania
Andropogon mannii	Hook. f.	MO	B. K. Simon	2281	-19.914972	33.027353	Zimbabwe
Andropogon mannii	Hook. f.	MO	Geritt Davidse	6561	-18.380204	32.75886	Zimbabwe
Andropogon mannii	Hook. f.	MO	R. Pasquet	1272	-9.063056	33.848056	Tanzania	MH181237
Andropogon mannii	Hook. f.	MO	Pasquet	1251	-0.78	36.6	Kenya	MH181231
Andropogon mohrii	(Hack.) Hack. ex Vasey	MO	R.K. Godfrey	78247	30.611628	-84.95796	USA
Andropogon mohrii	(Hack.) Hack. ex Vasey	MO	Sidney McDaniel	20967	30.247204	-88.726803	USA	MH181216
Andropogon mohrii	(Hack.) Hack. ex Vasey	MO	Robert Kral	54628	30.784183	-87.697156	USA
Andropogon munroi	C. B. Clarke	MO	D. E. Bufford	34724	31.67	100.37	China	MH181215
Andropogon munroi	C. B. Clarke	MO	R. R. Stewart	11414	30.455315	78.095924	India
Andropogon munroi	C. B. Clarke	MO	n/a	11977	30.976496	101.155836	China
Andropogon perligulatus	Stapf	MO	Simn T. Malcomber	SM 3108	-10.616667	35.633333	Tanzania
Andropogon perligulatus	Stapf	MO	John M. Fay	5690	8.40001	21.2667	Central African Republic
Andropogon perligulatus	Stapf	MO	K. Jeanes	248	-15.050201	22.719598	Zambia
Andropogon pinguipes	Stapf	MO	Jacques - Georges Adam	15975	14.372279	-14.889652	Senegal
Andropogon pinguipes	Stapf	MO	Anne Mette Lykke	544	13.666667	-16.5	Senegal
Andropogon pinguipes	Stapf	MO	Simon Laegaard	17870	13.666667	-16.55	Senegal
Andropogon polyptychos	Steud.	MO	Geritt Davidse	7671	6.89675	80.925781	Sri Lanka
Andropogon polyptychos	Steud.	MO	Geritt Davidse	8012	6.986297	80.783093	Sri Lanka
Andropogon polyptychos	Steud.	MO	Willem Meijer	1952	7.001344	80.772175	Sri Lanka
Andropogon pseudapricus	Stapf	MO	P. A. Schaefer	7958	10.716667	0.333333	Togo
Andropogon pseudapricus	Stapf	MO	Jacques - Georges Adam	8445	8.799775	-8.881631	Guinea
Andropogon pseudapricus	Stapf	MO	Jacques - Georges Adam	31479	7.568438	-4.975433	Cote d' Ivoire
Andropogon pteropholis	Clayton	K	I.K. Yamoah	514-10-18-1955	10.6384	-0.18701	Ghana
Andropogon pteropholis	Clayton	K	R. Rose Innes	31107	10.46666667	-0.533333333	Ghana
Andropogon pteropholis	Clayton	K	I.K. Yamoah	514-10-23-1954	10.638464	-0.18724	Ghana
Andropogon pumilus	Roxb.	K	A. Santapau	17200	12.852992	78.989735	India
Andropogon pumilus	Roxb.	K	H.F. Mooney	2342	21.520398	81.003657	India
Andropogon pumilus	Roxb.	K	K.T.B. Hodd	248	21.447226	74.429753	India
Andropogon pusillus	Hook. f.	K	J.K. Jackson, S.O. Magaji, P. Tuley	2054	7.03416	11.706835	Nigeria
Andropogon pusillus	Hook. f.	K	O. Hedberg	93147	4.166666667	9.216666667	Cameroon	MH181175
Andropogon pusillus	Hook. f.	K	H. Jacques-Felix	8970	7.208275	12.1222534	Cameroon
Schizachyrium reedii	(Hitchc. & Ekman) Borhidi & Catas�s	K	E.L. Ekman	1004	21.47754	-77.598023	Cuba	MH181217
Schizachyrium reedii	(Hitchc. & Ekman) Borhidi & Catas�s	K	E.L. Ekman	17186	23.034634	-81.697393	Cuba
Schizachyrium reedii	(Hitchc. & Ekman) Borhidi & Catas�s	K	E.L. Ekman	15326	21.379742	-77.972261	Cuba
Andropogon sanlorenzanus	T. Killeen	MO	Aimet Rodriguez	509	-14.818333	-60.44	Bolivia
Andropogon sanlorenzanus	T. Killeen	MO	Gerrit Davidse	15630	6.6	-67.266667	Venezuela
Andropogon sanlorenzanus	T. Killeen	MO	Howard Samuel Irwin	6771	-13.267796	-53.703586	Brazil
Andropogon scabriglumis	Swallen	MO	Simon Laegaard	18480	-4	-79.15	Ecuador
Andropogon scabriglumis	Swallen	MO	Simon Laegaard	20145	-3.133333	-79.166667	Ecuador
Andropogon scabriglumis	Swallen	MO	Simon Laegaard	20397	-2.25	-78.9	Ecuador
Andropogon schinzii	Hack. ex Schinz	MO	P. R. Guy	2331	-18.225559	28.947902	Zimbabwe
Andropogon schinzii	Hack. ex Schinz	MO	D. Vesey - Fitzgerald	2518	-11.783824	31.469007	Zambia
Andropogon schinzii	Hack. ex Schinz	MO	Robert Bruce Faden	74/474	-3.3	38.55	Kenya
Andropogon schirensis	Hochst. ex A. Rich.	MO	H. Suleiman	158	9.933333	34.533333	Tanzania
Andropogon schirensis	Hochst. ex A. Rich.	MO	John M. Fay	5682	8.483333	21.2	Central African Republic
Andropogon schirensis	Hochst. ex A. Rich.	MO	M. Reekmans	10084	-3.233333	29.466667	Burundi
Andropogon schirensis	Hochst. ex A. Rich.	MO	R. Pasquet	s.n.	-4.2055	39.469117	Kenya	MH181168
Andropogon schirensis	Hochst. ex A. Rich.	MO	R. Pasquet	1106	-4.21	39.48	Kenya	MH181225
Andropogon schirensis	Hochst. ex A. Rich.	MO	R. Pasquet	1108	-4.24472	39.42194	Kenya
Andropogon schirensis	Hochst. ex A. Rich.	MO	R. Pasquet	1170	-8.82639	31.4175	Zambia
Andropogon schirensis	Hochst. ex A. Rich.	MO	R. Pasquet	1202	-14.6822	24.53278	Zambia
Andropogon selloanus	(Hack.) Hack.	MO	T. Miranda	259	-14.591033	-68.375633	Bolivia
Andropogon selloanus	(Hack.) Hack.	MO	Richard W. Pohl	12395	14.135435	-86.815837	Honduras	MH181213
Andropogon selloanus	(Hack.) Hack.	MO	Geritt Davidse	2471	10.746761	-61.319057	Trinidad and Tobago
Andropogon tectorum	Schumach. & Thonn.	MO	Jacques - Georges Adam	6901	8.536801	-9.47957	Guinea
Andropogon tectorum	Schumach. & Thonn.	MO	J. W. A. Jansen	2597	6.887827	0.637593	Togo
Andropogon tectorum	Schumach. & Thonn.	MO	H. Ndoma	824	5.434999	8.608333	Nigeria
Andropogon tenuiberbis	Hack.	MO	J. Lovett	2387	-8.516667	35.166667	Tanzania
Andropogon tenuiberbis	Hack.	MO	John M. Fay	6081	8.483333	21.216667	Central African Republic
Andropogon tenuiberbis	Hack.	MO	Jacques - Georges Adam	31644	12.560991	-16.244572	Senegal
Andropogon ternarius	MIchx.	MO	Franck C. Seymour	2470	37.431902	-77.050491	USA
Andropogon ternarius	MIchx.	MO	Danny E. Daniel	20	31.954049	-95.933962	USA
Andropogon ternarius	MIchx.	MO	Douglas Ladd	13393	37.417466	-94.1205	USA
Andropogon ternatus	(Spreng.) Nees	K	G. Davidse, Angel Gonzalez	14263	6.183333333	-67.21666667	Venezuela
Andropogon ternatus	(Spreng.) Nees	K	J.R.I. Wood	27041	-13.48333333	-60.73333333	Bolivia
Andropogon ternatus	(Spreng.) Nees	K	J.R.I. Wood, D. Soto	25327	-16.5083	-61.9971	Bolivia
Andropogon textilis	Welw. ex Rendle	K	unknown	11.244	-13.758255	21.600734	Angola
Andropogon textilis	Welw. ex Rendle	K	D. Vesey-Fitzgerald	1500	-8.466047	32.005568	Tanzania
Andropogon textilis	Welw. ex Rendle	K	M. McCallum Webster	T132	-7.99539	31.673388	Tanzania
Andropogon urbanianus	Hitchc.	MO	Erik L. Ekman	H1936	18.367474	-71.986623	Haiti
Andropogon urbanianus	Hitchc.	MO	Erik L. Ekman	H5358	18.402585	-74.04432	Haiti
Andropogon urbanianus	Hitchc.	MO	Gerrit Davidse	2691	18.810794	-70.660081	Dominican Republic	MH181230
Andropogon vetus	Sohns	MO	Julian A. Steyermark	113118	5.74	-63.696667	Venezuela
Andropogon vetus	Sohns	MO	Angel Fernandez	7728	3.716667	-65.75	Venezuela
Andropogon vetus	Sohns	MO	Julian Steyermark	125810	3.66667	-65.75	Venezuela
Andropogon virgatus	Desv. ex Ham.	MO	J.D. Dwyer	7587	8.779461	-82.660867	Panama	MH181223
Andropogon virgatus	Desv. ex Ham.	MO	Gerrit Davidse	32451	16.508333	-88.691667	Belize
Andropogon virgatus	Desv. ex Ham.	MO	T. Rojas	3746	-23.887739	-56.337126	Paraguay
Andropogon virginicus	L.	MO	R. Dale Thomas	158266	34.042206	-92.217396	USA
Andropogon virginicus	L.	MO	Norlan C. Henderson	96721	34.783089	-87.028911	USA
Andropogon virginicus	L.	MO	Mark J. Leoschke	1922	40.906852	-92.398686	USA
Diheteropogon amplectens	(Nees) Clayton	MO	Ndegwa, *	797	-2.276556	37.831044	Kenya
Diheteropogon amplectens	(Nees) Clayton	MO	Geritt Davidse	6005	-25.547439	28.614136	South Africa
Diheteropogon amplectens	(Nees) Clayton	MO	Petrus Cornelis Vermuelen du Troit	1096	-25.65542	30.264936	South Africa
Diheteropogon amplectens	(Nees) Clayton	MO	Pasquet	1169	-8.82639	31.4175	Zambia
Diheteropogon filifolius	(Nees) Clayton	MO	Robert Brand	316	-31.384395	29.8951	South Africa
Diheteropogon filifolius	(Nees) Clayton	MO	Geritt Davidse	33593	-33.804179	18.910516	South Africa
Diheteropogon filifolius	(Nees) Clayton	MO	C. Everson	199	-28.725369	29.363567	South Africa
Diheteropogon grandiflorus	(Hack.) Stapf	MO	F. Malaisse	2148	-9.837863	22.210127	Democratic Republic of Congo
Diheteropogon grandiflorus	(Hack.) Stapf	MO	D. K. Harder	3618	-14.875	24.60583	Zambia
Diheteropogon grandiflorus	(Hack.) Stapf	MO	D. K. Harder	2866	-11.2275	24.15833	Zambia
Diheteropogon grandiflorus	(Hack.) Stapf	MO	R. Pasquet	1186	-11.6708	31.95611	Zambia
Diheteropogon hagerupii	Hitchc.	MO	C. Vander Berghen	8229	13.780438	-13.686326	Senegal
Diheteropogon hagerupii	Hitchc.	MO	C. Geerling	1282	11.166106	-4.45327	Burkina Faso
Diheteropogon hagerupii	Hitchc.	MO	R. Bartha	7162	14.416155	3.318145	Niger
Elymandra androphila	(Stapf) Stapf	MO	J.G. Adam	26549	7.620687	-8.472481	Guinea
Elymandra androphila	(Stapf) Stapf	MO	J.G. Adam	24558	7.482951	-8.582763	Liberia
Elymandra androphila	(Stapf) Stapf	MO	J.G. Adam	24797	7.482183	-8.568927	Liberia	MH181166
Elymandra archaelymandra	(Jacq.-F�l.) Clayton	K	A. Blair Rains	11	13.346856	-15.836819	Gambia
Elymandra archaelymandra	(Jacq.-F�l.) Clayton	K	Simon Laegaard	17210	12.48333333	-12.23333333	Senegal
Elymandra archaelymandra	(Jacq.-F�l.) Clayton	K	J.G. Adam	15489	14.314202	-15.217511	Senegal
Elymandra grallata	(Stapf) Clayton	MO	P.A. Smith	1950	-19.75333333	23.3	Botswana
Elymandra grallata	(Stapf) Clayton	MO	P.A. Smith	3440	-19.14694444	22.25027778	Botswana
Elymandra grallata	(Stapf) Clayton	MO	G. Davidse, W.L. Handlos	7213	-11.056287	31.934457	Zambia
Elymandra grallata	(Stapf) Clayton	MO	R. Pasquet	1184	-11.66583	30.96389	Zambia
Elymandra lithophila	(Trin.) Clayton	K	Goodier and Phipps	3	-19.806458	32.871414	Zimbabwe/Zambesi
Elymandra lithophila	(Trin.) Clayton	K	W.R. Anderson, M. Stieber, J.H. Kirkbride, Jr.	35802	-18.509346	-43.333602	Brazil
Elymandra lithophila	(Trin.) Clayton	K	B.K. Simon, R.D. Kelly	1845	-19.778681	33.038777	Zimbabwe
Elymandra subulata	Jacq.-F�l.	K	Jacques-Felix	7306	10.924861	-14.297173	Guinea	MH181214
Elymandra subulata	Jacq.-F�l.	K	P.A. Adams	397	11.33042	-12.282466	Guinea
Elymandra subulata	Jacq.-F�l.	K	J.G. Adam	12696	11.761886	-13.06611	Guinea
Exotheca abyssinica	(Hochst. ex A. Rich.) Andersson	MO	L. Averyanov	3253	12.13333333	108.65	Vietnam
Exotheca abyssinica	(Hochst. ex A. Rich.) Andersson	MO	M. Reekmans	1809	-3.229941	29.58087	Burundi
Exotheca abyssinica	(Hochst. ex A. Rich.) Andersson	MO	C.J. Kayombo, M.J. Kayombo	1	-8.516666667	35.16666667	Tanzania
Exotheca abyssinica	(Hochst. ex A. Rich.) Andersson	MO	R. Pasquet	1102	1.1075667	35.3843333	Kenya	MH181196
Hyparrhenia anamesa	Clayton	MO	L. Smook	5609	-32.295056	28.541705	South Africa
Hyparrhenia anamesa	Clayton	MO	G. Davidse, B. Simon, G. Pope	6686	-18.549177	30.916034	Zimbabwe (Rhodesia)
Hyparrhenia anamesa	Clayton	MO	W.J.J.O. de Wilde, B.E.E. de Wilde-Duyfjes	6970	7.649783	36.850733	Ethiopia
Hyparrhenia anamesa	Clayton	MO	R. Pasquet	1079	-1.10472	36.61139	Kenya
Hyparrhenia anemopaegma	Clayton	K	P.P. Smith	974	-11.76666667	32.16666667	Zambia
Hyparrhenia anemopaegma	Clayton	K	W.L. Astle	5835	-13.296359	31.081309	Zambia	MH181199
Hyparrhenia anemopaegma	Clayton	K	W.L. Astle	5629	-12.647961	31.144824	Zambia
Hyparrhenia anthistirioides	(Hochst. ex A. Rich.) Andersson ex Stapf	MO	J.J.F.E. De Wilde	5829	9.333333333	41.81666667	Ethiopia
Hyparrhenia anthistirioides	(Hochst. ex A. Rich.) Andersson ex Stapf	MO	J.W. Ash	2693A	9.416666667	38.63333333	Ethiopia
Hyparrhenia anthistirioides	(Hochst. ex A. Rich.) Andersson ex Stapf	MO	F.G. Meyer	7439	8.666666667	39.08333333	Ethiopia
Hyparrhenia anthistirioides	(Hochst. ex A. Rich.) Andersson ex Stapf	MO	R. Pasquet	1146B	-8.966389	33.15611	Tanzania
Hyparrhenia arrhenobasis	(Hochst. ex Steud.) Stapf	MO	J.J.F.E De Wilde, G.J.H. Amshoff	6541	7.15	38.68333333	Ethiopia
Hyparrhenia arrhenobasis	(Hochst. ex Steud.) Stapf	MO	A. Pappi	2081	15.737803	36.35513	Eritrea
Hyparrhenia arrhenobasis	(Hochst. ex Steud.) Stapf	MO	Enrico Bartolozzi	n/a	9.028746	38.367381	Ethiopia?
Hyparrhenia bagirmica	(Stapf) Stapf	K	D.V. Thatcher	S. 511	12.7358	7.824217	Nigeria
Hyparrhenia bagirmica	(Stapf) Stapf	K	D. Clayton	DC 1379	12.937036	7.926411	Nigeria
Hyparrhenia bagirmica	(Stapf) Stapf	K	D.V. Thatcher	S. 526	11.131654	7.630024	Nigeria	MH181190
Hyparrhenia barteri	(Hack.) Stapf	MO	P.J. Greenway, Kanuri	14347	-7.497375	34.99252	Tanzania
Hyparrhenia barteri	(Hack.) Stapf	MO	John M. Fay	5933	8.483333333	2.2	Central African Republic
Hyparrhenia barteri	(Hack.) Stapf	MO	Bruce Hulberg	318	8.4833334	21.23333333	Central African Republic
Hyparrhenia bracteata	(Humb. & Bonpl. ex Willd.) Stapf	MO	Don Hazlett	987	14.60416667	-87.845	Honduras
Hyparrhenia bracteata	(Humb. & Bonpl. ex Willd.) Stapf	MO	J.A. Ralter, S. de Fonseca	3008	-15.97916667	-47.92305556	Brazil
Hyparrhenia bracteata	(Humb. & Bonpl. ex Willd.) Stapf	MO	John M. Fay	5695	8.4	21.26666667	Central African Republic
Hyparrhenia bracteata	(Humb. & Bonpl. ex Willd.) Stapf	MO	R. Pasquet	1248	-0.79667	36.76806	Kenya
Hyparrhenia coleotricha	(Steud.) Clayton	MO	J.W. Ash	2737A	8.25	37.58333333	Ethiopia
Hyparrhenia coleotricha	(Steud.) Clayton	MO	P.J. Greenway, Kanuri	14272	-7.750744	35.640445	Tanzania
Hyparrhenia coleotricha	(Steud.) Clayton	MO	A. Pappi	1506	14.91833333	39.42083333	Eritrea
Hyparrhenia collina	Pilg.) Stapf	MO	M. Reekmans	7822	-2.933333333	29.6	Burundi
Hyparrhenia collina	Pilg.) Stapf	MO	R.E. Gereau, L. Festo, G. Gobbo, G. Massawe, N. Mollel, L. Lema	6476	-3.432777778	36.09694444	Tanzania
Hyparrhenia collina	Pilg.) Stapf	MO	P.C.V. du Toit	2412	-29.03861111	30.59027778	South Africa
Hyparrhenia collina	Pilg.) Stapf	MO	R. Pasquet	1093	-1.09	36.91139	Kenya
Hyparrhenia confinis (var. nudiglumis)	(Hack.) Clayton	K	Michael Jensen, Ib Friis, Menassie Gashaw, Fantahun Simon, Lemessa Keneei	B1/19	8.166666667	34.58333333	Ethiopia
Hyparrhenia confinis (var. nudiglumis)	(Hack.) Clayton	K	Ib Friis, Asefa Hailu, Ermias Getachew	12690	10.45277778	34.55555556	Ethiopia
Hyparrhenia confinis (var. nudiglumis)	(Hack.) Clayton	K	J.D. Lea	190	11.16757	34.103953	Blue Nile
Hyparrhenia cyanescens	(Stapf) Stapf	K	R.W.J Keay	5490	10.73082	7.589367	Nigeria
Hyparrhenia cyanescens	(Stapf) Stapf	K	D.V. Hubbard	S. 586	9.067452	6.000647	Nigeria
Hyparrhenia cyanescens	(Stapf) Stapf	K	G. Boudet	4593	13.008407	-14.197632	Senegal
Hyparrhenia cymbaria	(L.) Stapf	MO	I.F. LaCroix	3817	-11.42333333	34.01555556	Malawi
Hyparrhenia cymbaria	(L.) Stapf	MO	Al Gentry	11709	-17.81333333	47.02388889	Madagascar
Hyparrhenia cymbaria	(L.) Stapf	MO	L Smook	1553	-27.82888889	31.35027778	South Africa
Hyparrhenia cymbaria	(L.) Stapf	MO	R. Pasquet	1123	1.113889	35.11917	Kenya
Hyparrhenia cymbaria	(L.) Stapf	MO	R. Pasquet	1253	-10.6211	33.80278	Malawi
Hyparrhenia dichroa	(Steud.) Stapf	MO	B.M. Browning	1	-17.7975	31.05444444	Zimbabwe	MH181192
Hyparrhenia dichroa	(Steud.) Stapf	MO	B.K. Simon	2220	-17.22277778	31.70055556	Zimbabwe
Hyparrhenia dichroa	(Steud.) Stapf	MO	P.J. Greenway, Kanuri	14394	-7.672533	34.796681	Tanzania
Hyparrhenia dichroa	(Steud.) Stapf	MO	R. Pasquet	1215	-13.5472	28.24778	Zambia	MH181169
Hyparrhenia diplandra	(Hack.) Stapf	MO	M. Reekmans	10062	-3.233333333	29.46666667	Burundi
Hyparrhenia diplandra	(Hack.) Stapf	MO	L. Ngok Banak	1639	1.371666667	12.53972222	Gabon
Hyparrhenia diplandra	(Hack.) Stapf	MO	John M. Fay	5692	8.4	21.26666667	Central African Republic
Hyparrhenia diplandra	(Hack.) Stapf	MO	R. Pasquet	1126	0.370556	34.88139	Kenya
Hyparrhenia diplandra	(Hack.) Stapf	MO	R. Pasquet	1181	-11.6658	31.96389	Zambia
Hyparrhenia diplandra	(Hack.) Stapf	MO	R. Pasquet	1218	-12.5989	30.39278	Zambia
Hyparrhenia dregeana	(Nees) Stapf ex Stent	MO	B. Maguire	8215	-24.14138889	29.16833333	South Africa
Hyparrhenia dregeana	(Nees) Stapf ex Stent	MO	Jean Pawek	9310	-10.743515	33.780359	Malawi
Hyparrhenia dregeana	(Nees) Stapf ex Stent	MO	E. Westphal, J.M.C. Westphal-Stevels	1574	7.827784	39.126238	Ethiopia
Hyparrhenia dregeana	(Nees) Stapf ex Stent	MO	R. Pasquet	1252	-10.6211	33.80278	Malawi
Hyparrhenia exarmata	(Stapf) Stapf	K	John M. Fay	2050	5.683333333	20.68333333	Central African Republic
Hyparrhenia exarmata	(Stapf) Stapf	K	L. Lebrun	1647	3.715897	18.616986	Democratic Republic of Congo
Hyparrhenia exarmata	(Stapf) Stapf	K	G. Troupin	2007	4.18047	29.51817	Democratic Republic of Congo
Hyparrhenia familiaris	(Steud.) Stapf	MO	M. Reekmans	8885	-3.416666667	29.43333333	Burundi
Hyparrhenia familiaris	(Steud.) Stapf	MO	M. Reekmans	10083	-3.2334	29.46666667	Burundi
Hyparrhenia familiaris	(Steud.) Stapf	MO	L. White	837	-0.25	11.66666667	Gabon
Hyparrhenia figariana	(Chiov.) Clayton	MO	P.J. Greenway, Kanuri	14369	-7.655217	24.729825	Tanzania
Hyparrhenia figariana	(Chiov.) Clayton	MO	M. Reekmans	11042	-3.366666667	29.33333333	Burundi	MH181220
Hyparrhenia figariana	(Chiov.) Clayton	MO	H.J. Schlieben	6263	-9.979883	39.670936	Tanzania
Hyparrhenia filipendula	(Hochst.) Stapf	MO	C.E. Hubbard	2017	-27.465576	152.937402	Australia
Hyparrhenia filipendula	(Hochst.) Stapf	MO	L. Smook	2529 AC	-24.576105	28.875141	South Africa
Hyparrhenia filipendula	(Hochst.) Stapf	MO	P.J. Dye	267077	-20.305225	28.538726	Zimbabwe
Hyparrhenia filipendula	(Hochst.) Stapf	MO	R. Pasquet	1107	-4.21472	39.48222	Kenya
Hyparrhenia filipendula	(Hochst.) Stapf	MO	R. Pasquet	1125	1.093056	35.11861	Kenya
Hyparrhenia filipendula	(Hochst.) Stapf	MO	R. Pasquet	1244	-7.36333	37.115	Tanzania
Hyparrhenia finitima	(Hochst. ex A. Rich.) Stapf	K	O.R.T. van Vuwen	1685	-22.87444	29.92269	South Africa
Hyparrhenia finitima	(Hochst. ex A. Rich.) Stapf	K	J.J.F.E. De Wilde, M.G. Gilbert	243	13.157485	37.92196	Ethiopia
Hyparrhenia finitima	(Hochst. ex A. Rich.) Stapf	K	M. McCallum Webster	T75	-7.205297	31.247034	Tanzania
Hyparrhenia formosa	Stapf	MO	G. Davidse	7104	-0.370353	36.03631	Kenya
Hyparrhenia formosa		MO	A.A. Bullock, R. Shabawi	n/a	4.929656	31.300041	Tanzania?
Hyparrhenia formosa	Stapf	MO	G.R. Williams	6258	0.517529	35.240203	Kenya
Hyparrhenia gazensis	(Rendle) Stapf	MO	S.A. Robertson	2023	-0.395376	37.229951	Kenya
Hyparrhenia gazensis	(Rendle) Stapf	MO	A.B. Katende	K2233	0.120056	32.35015	Uganda
Hyparrhenia gazensis	(Rendle) Stapf	MO	P.C.V. du Toit	1049	-25.005133	30.816352	South Africa
Hyparrhenia glabriscula	(Hochst. ex A. Rich.) Stapf	MO	W.J. Howard	BV 943	9.155577	9.846118	Nigeria
Hyparrhenia glabriscula	(Hochst. ex A. Rich.) Stapf	MO	John Sihvonen	239	11.470649	-2.816819	Burkina Faso
Hyparrhenia glabriscula	(Hochst. ex A. Rich.) Stapf	MO	Hall and Duodu	42215	8.469455	-0.012141	Ghana
Hyparrhenia hirta	(L.) Stapf	MO	Gerrit Davidse	3202	8.880277778	-70.635	Venezuela
Hyparrhenia hirta	(L.) Stapf	MO	Neil Snow, Bryan Simon	7310	-28.66972222	150.8744444	Australia
Hyparrhenia hirta	(L.) Stapf	MO	Reading Univ./BM. Exped.	158	31.54111111	-9.682222222	Morocco
Hyparrhenia hirta	(L.) Stapf	MO	Pasquet	1101	0.485	35.71444	Kenya
Hyparrhenia involucrata	Stapf	MO	Oguntayo, Fagbemi, Oyayomi, Onijamowo, Arasi	20	9.315914	5.040909	Nigeria
Hyparrhenia involucrata	Stapf	MO	John M. Fay	5796	8.483333333	21.22333333	Central African Republic
Hyparrhenia involucrata	Stapf	MO	Guy Roberty	12508	5.300746	-4.375908	Cote d'Ivoire
Hyparrhenia madaropoda	Clayton	MO	M. Reekmans	6922	-4.333333333	29.6	Burundi
Hyparrhenia madaropoda	Clayton	MO	A.B. Katende, K. Lye	K 239	1.716666667	33.63333333	Uganda
Hyparrhenia madaropoda	Clayton	MO	J. Lambinon	78/79	-3.338412	29.314139	Burundi
Hyparrhenia mobukensis	(Chiov.) Chiov.	K	J.D. Snowden	1485	-1.242337	29.600343	Uganda
Hyparrhenia mobukensis	(Chiov.) Chiov.	K	A.S. Thomas	Th 2664	1.096776	34.552739	Uganda
Hyparrhenia mobukensis	(Chiov.) Chiov.	K	L.D.E.F. Vesey-FitzGerald	C.J. 5003	-3.255204	36.751095	Tanzania	MH181195
Hyparrhenia multiplex	(Hochst. ex A. Rich.) Andersson ex Stapf	K	G.E. Wickens	2620	12.93842	24.06159	Sudan
Hyparrhenia multiplex	(Hochst. ex A. Rich.) Andersson ex Stapf	K	G.E. Wickens	2368	13.327222	24.540428	Sudan
Hyparrhenia multiplex	(Hochst. ex A. Rich.) Andersson ex Stapf	K	Chiovenda	2351	12.606366	37.446864	Ethiopia
Hyparrhenia mutica	Clayton	MO	R. Pasquet	1172	-8.82889	31.44556	Zambia
Hyparrhenia newtonii	(Hack.) Stapf	MO	Thomas B. Croat	29625	-18.836958	47.349752	Madagascar
Hyparrhenia newtonii	(Hack.) Stapf	MO	P.C.V. du Toit	1008	-25.056115	30.936067	South Africa
Hyparrhenia newtonii	(Hack.) Stapf	MO	M. Reekmans	10370	-3.4	29.68333333	Burundi
Hyparrhenia newtonii	(Hack.) Stapf	MO	R. Pasquet	1146a			Tanzania
Hyparrhenia newtonii	(Hack.) Stapf	MO	R. Pasquet	1154	-10.1072	30.91889	Zambia	MH181229
Hyparrhenia newtonii	(Hack.) Stapf	MO	R. Pasquet	1219	-12.5989	30.39278	Zambia
Hyparrhenia niariensis	(Franch.) Clayton	MO	John M. Fay	6001	8.416666667	21.23333333	Central African Republic
Hyparrhenia niariensis	(Franch.) Clayton	MO	R. Quarre	2932	-8.826316	24.818619	Congo
Hyparrhenia niariensis	(Franch.) Clayton	MO	M. Reekmans	6104	-3.25	29.41666667	Burundi
Hyparrhenia nyassae	(Rendle) Stapf	MO	D.M. Browning	281213	-17.799927	31.05276	Zimbabwe
Hyparrhenia nyassae	(Rendle) Stapf	MO	John M. Fay	6040	8.5	21.21666667	Central African Republic
Hyparrhenia nyassae	(Rendle) Stapf	MO	A.S. Masombuka	53	-25.361656	30.327468	South Africa
Hyparrhenia nyassae	(Rendle) Stapf	MO	R. Pasquet	1168	-8.82694	31.41306	Zambia
Hyparrhenia papillipes	(Hochst. ex A. Rich.) Andersson ex Stapf	MO	J.W. Ash	2674	9.249209	38.380475	Ethiopia
Hyparrhenia papillipes	(Hochst. ex A. Rich.) Andersson ex Stapf	MO	A.F.H. Linsen, W.B.J.T. Giesen	179	0.333333333	37.75	Kenya	MH181179
Hyparrhenia papillipes	(Hochst. ex A. Rich.) Andersson ex Stapf	MO	M. Schmitz	4141	-29.398946	27.762382	Lesotho
Hyparrhenia pilgeriana	C.E. Hubb.	MO	Protase K. Rwaburindore	4126	-0.35	30.51666667	Uganda
Hyparrhenia pilgeriana	C.E. Hubb.	MO	G.W. Frame	92	-2.917887	35.863503	Tanzania
Hyparrhenia pilgeriana	C.E. Hubb.	MO	S.A. Renvoize	5672	-11.798242	29.592938	Zambia
Hyparrhenia poecilotricha	(Hack.) Stapf	MO	G. Davidse	9188	-0.211028	35.715072	Kenya
Hyparrhenia poecilotricha	(Hack.) Stapf	MO	Jean Pawek	6786	-11.466962	34.036693	Malawi
Hyparrhenia poecilotricha	(Hack.) Stapf	MO	B.N.N. Mbano	DSM 748	-2.482825	32.904831	Tanzania
Hyparrhenia quarrei	Robyns	MO	L. Smook	6776	-27.168165	28.867921	South Africa
Hyparrhenia quarrei	Robyns	MO	Y.S. Abeid	2865	-9.071666667	33.95972222	Tanzania
Hyparrhenia quarrei	Robyns	MO	A.O. Crook	2403	-25.596579	30.282065	South Africa
Hyparrhenia quarrei	Robyns	MO	R. Pasquet	1090	-1.12417	36.93306	Kenya
Hyparrhenia quarrei	Robyns	MO	R. Pasquet	1114	-8.6325	36.7125	Tanzania
Hyparrhenia quarrei	Robyns	MO	R. Pasquet	1188	-12.4581	31.28972	Zambia
Hyparrhenia rudis	Stapf	MO	M. Reekmans	10227	-3.969407	30.115	Burundi
Hyparrhenia rudis	Stapf	MO	G. Sturtz	GS 309	-7.960946	31.625896	Tanzania
Hyparrhenia rudis	Stapf	MO	P.A. Smith	4271	-18.51777778	25.65416667	Botswana
Hyparrhenia rudis	Stapf	MO	R. Pasquet	1091	-1.09694	36.91389	Kenya
Hyparrhenia rudis	Stapf	MO	R. Pasquet	1238	-7.6675	31.33806	Tanzania	MH181164
Hyparrhenia rufa	(Nees) Stapf	MO	K.R. Wood, L. Arnold	9288	22.081239	-159.667983	US
Hyparrhenia rufa	(Nees) Stapf	MO	R.E. Gereau, N. Dumetz	3240	-25.01666667	46.95	Madagascar
Hyparrhenia rufa	(Nees) Stapf	MO	A.J.M. Leeuwenberg, WEA v. Beek	10424	10.61666667	13.23333333	Cameroon
Hyparrhenia rufa	(Nees) Stapf	MO	Traiperm and Layton	513	16.7248333	101.7227778	Thailand
Hyparrhenia rufa	(Nees) Stapf	MO	Traiperm and Layton	558	18.8119444	98.94277778	Thailand
Hyparrhenia rufa	(Nees) Stapf	MO	R. Pasquet	1077	-4.47167	39.4492	Kenya
Hyparrhenia rufa	(Nees) Stapf	MO	R. Pasquet	1088	-1.14	36.95472	Kenya
Hyparrhenia rufa	(Nees) Stapf	MO	R. Pasquet	1115	-8.21444	36.69167	Tanzania
Hyparrhenia rufa	(Nees) Stapf	MO	R. Pasquet	1182	-11.6658	31.96389	Zambia
Hyparrhenia schimperi	(Hochst. ex A. Rich.) Andersson ex Stapf	MO	Jean Pawek	6851	-11.43436796	34.04062991	Thailand
Hyparrhenia schimperi	(Hochst. ex A. Rich.) Andersson ex Stapf	MO	K.E. Bennett	283138	-17.787631	31.054792	Zimbabwe
Hyparrhenia schimperi	(Hochst. ex A. Rich.) Andersson ex Stapf	MO	Richard Razakamalala	2775	-14.385	49.41361111	Madagascar
Hyparrhenia smithiana	(Hook. f.) Stapf	MO	R.D. Noyes, C.C.H. Jongkind, D.K. Abbiw	1144	6.316666667	0.05	Ghana
Hyparrhenia smithiana	(Hook. f.) Stapf	MO	P. Poilecot	50869	7.63333334	-5.033333333	Cote d'Ivoire
Hyparrhenia smithiana	(Hook. f.) Stapf	MO	Margaret Buckner	172	5.366666667	25.36666667	Central African Republic
Hyparrhenia subplumosa	Stapf	MO	John M. Fay	6088	8.682264	21.719147	Central African Republic
Hyparrhenia subplumosa	Stapf	MO	Jean Pawek	6778	-11.435107	34.031266	Malawi
Hyparrhenia subplumosa	Stapf	MO	P. Poilecot	50872	7.633333333	-5.033333333	Cote D'Ivoire
Hyparrhenia tamba	(Hochst. ex Steud.) Andersson ex Stapf	MO	Jonquil W. Ash	2693	9.24917	38.380369	Ethiopia
Hyparrhenia tamba	(Hochst. ex Steud.) Andersson ex Stapf	MO	A.J. Mullins	sn 4	-33.66137	26.686987	South Africa
Hyparrhenia tamba	(Hochst. ex Steud.) Andersson ex Stapf	MO	P.C.V. du Toit	2390	-29.031938	30.526313	South Africa
Hyparrhenia tuberculata	Clayton	K	I. Friis, M.G. Gilbert, F. Rasmussen, K. Vollesen	1231	8.966666667	38.58333333	Ethiopia
Hyparrhenia tuberculata	Clayton	K	Jonquil Ash	2091	10.51666667	38.75	Ethiopia
Hyparrhenia tuberculata	Clayton	K	Jonquil Ash	2654	9.05	38.56666667	Ethiopia
Hyparrhenia umbrosa	(Hochst.) Andersson ex Clayton	MO	Eleanor Phillips	1703	-10.739822	33.718909	Malawi	MH181226
Hyparrhenia umbrosa	(Hochst.) Andersson ex Clayton	MO	Protase K. Rwaburindore	858	-0.366667	30.48333333	Uganda
Hyparrhenia umbrosa	(Hochst.) Andersson ex Clayton	MO	A.J.M. Leeuwenberg	8667	4.966666667	9.933333333	Cameroon
Hyparrhenia variabilis	Stapf	MO	F. Rakotonasolo	RNF 1826	-20.61833333	45.83555556	Madagascar
Hyparrhenia variabilis	Stapf	MO	D. Edwards	3347	-24.083535	30.382839	South Africa
Hyparrhenia variabilis	Stapf	MO	J.W. Ash	2239	7.974793	37.427788	Ethiopia
Hyparrhenia variabilis	Stapf	MO	R. Pasquet	1124	1.1125	35.11917	Kenya
Hyparrhenia variabilis	Stapf	MO	R. Pasquet	1214	-13.5472	28.24778	Zambia	MH181202
Hyparrhenia violascens	(Stapf) Clayton	K	F.N. Hepper	3876	9.903708	4.650823	Nigeria	MH181167
Hyparrhenia violascens	(Stapf) Clayton	K	F.N. Hepper	1282	8.416666667	11.83333333	British Cameroons
Hyparrhenia violascens	(Stapf) Clayton	K	A. Blair Rains	259	12.008628	7.838894	Nigeria
Hyparrhenia welwitschii	(Rendle) Stapf	MO	John M. Fay	6014	8.483333333	21.21666667	Central African Republic
Hyparrhenia welwitschii	(Rendle) Stapf	MO	C.J. Kayombo, D. Sitoni, K. Busasi, M. James	3272	-2.595555556	33.43583333	Tanzania
Hyparrhenia welwitschii	(Rendle) Stapf	MO	D.A. Lininstone	81-12	-15.387695	35.337849	Malawi
Monocymbium ceresiiforme	(Nees) Stapf	MO	R.E. Gereau, C.J. Kayombo, I. Mpongo	6058	-4.611388889	29.49388889	Tanzania
Monocymbium ceresiiforme	(Nees) Stapf	MO	Jean Pawek	9261	-10.741595	33.782111	Malawi
Monocymbium ceresiiforme	(Nees) Stapf	MO	B.O. Daramola, J.A. Emwiogbon	72386	6.510564	7.510798	Nigeria
Monocymbium ceresiiforme	(Nees) Stapf	MO	R. Pasquet	1198B	-18.2886	32.76722	Zimbabwe
Monocymbium ceresiiforme	(Nees) Stapf	MO	R. Pasquet	1255	-11.6572	24.1025	Zambia
Monocymbium deightonii	C.E. Hubb.	MO	J.G. Adam	30745	9.050875	-9.597429	Guinea
Monocymbium deightonii	C.E. Hubb.	MO	J.T. Baldwin, Jr	10064	8.371092	-9.824655	Liberia
Monocymbium deightonii	C.E. Hubb.	MO	J.G. Adam	6754	8.644069	-9.722913	Guinea
Monocymbium lanceolatum	C.E. Hubb. ex Hutch. & Dalziel	K	J.G. Adam	6762	10.027437	-9.27519	Guinea	MH181170
Monocymbium lanceolatum	C.E. Hubb. ex Hutch. & Dalziel	K	S.O. Sokopo, Lucia Lopez Poveda, Kabbie M.T. Kanu, Tamba Koroma	8	8.961972	11.66575	Sierra Leone
Monocymbium lanceolatum	C.E. Hubb. ex Hutch. & Dalziel	K	S.M. van der Burgt, Mathew James, Joseph Momoh	1574	8.986778	11.629167	Sierra Leone
Schizachrium pseudeulalia	(Hosok.) S.T. Blake	MO	I.D. Cowie	11907	-15.60944444	135.4366667	Australia
Schizachrium pseudeulalia	(Hosok.) S.T. Blake	MO	B.K. Simon	3962	-17.36666667	124.9166667	Australia
Schizachrium pseudeulalia	(Hosok.) S.T. Blake	MO	A. Kneucker	790	14.526286	121.047466	Phillipines
Schizachyrium brevifolium	(Sw.) Nees ex Buse	MO	Simon Laegaard	21753	18.86666667	98.78333333	Thailand
Schizachyrium brevifolium	(Sw.) Nees ex Buse	MO	I.L. Amaral, M.N. Silva, O.P. Monteiro, J. Lima, L. Brako, W.D. Reese, M. Dibben	965	-9.366666667	-54.9	Brazil
Schizachyrium brevifolium	(Sw.) Nees ex Buse	MO	C.J. Kayombo	2167	-8.4875	36.475	Tanzania
Schizachyrium brevifolium	(Sw.) Nees ex Buse	MO	Traiperm and Layton	515	16.72694444	101.7130556	Thailand
Schizachyrium cirratum	(Hack.) Wooten & Standl.	MO	Ernest Lyonnet	2445	18.99194444	-99.28333333	Mexico	MH181235
Schizachyrium cirratum	(Hack.) Wooten & Standl.	MO	Oswaldo Tellez V, G. Flores F.	11596	22.25	-104.6666667	Mexico
Schizachyrium cirratum	(Hack.) Wooten & Standl.	MO	O.B. Metcalfe	1495	32.92111111	-107.6977778	US
Schizachyrium claudopus	(Chiov.) Chiov.	K	B.K. Simon, G. Williamson	1919	-11.52251	24.149661	Zambia
Schizachyrium claudopus	(Chiov.) Chiov.	K	B.K. Simon, G. Williamson	1965	-11.509388	24.399609	Zambia
Schizachyrium claudopus	(Chiov.) Chiov.	K	W.L. Astle	906	-10.559279	29.909706	Zambia	MH181228
Schizachyrium crinizonatum	S. T. Blake	K	S.T. Blake	16032	-14.51	130.133	Australia
Schizachyrium crinizonatum	S. T. Blake	K	S.T. Blake	13572	-17.200535	144.544355	Australia
Schizachyrium crinizonatum	S. T. Blake	K	J.R. Clarkson	4513	-13.35	141.7333333	Australia
Schizachyrium cubense	(Hack.) Nash	K	E.L. Ekman	11243	22.424964	-83.689232	Cuba
Schizachyrium cubense	(Hack.) Nash	K	E.L. Ekman	12147	21.79122583	-83.04814978	Cuba
Schizachyrium cubense	(Hack.) Nash	K	E.L. Ekman	11993	21.826251	-82.96015	Cuba	MH181205
Schizachyrium delavayi	(Hack.) Bor	K	R.J. Soreng, P.M. Peterson, Sun Hang	5596	30.08333333	95.25	Tibet	MH185800
Schizachyrium delavayi	(Hack.) Bor	K	R.J. Soreng, P.M. Peterson, Sun Hang	5305	26.16666667	103.25	China
Schizachyrium delavayi	(Hack.) Bor	K	Bor & Kirat Ram	20334	27.483793	88.902055	Tibet
Schizachyrium delicatum	Stapf	K	R. Rose Innes	2966 OR 32400	9.666666667	-2.483333333	Ghana
Schizachyrium delicatum	Stapf	K	P. Tuley	1715	9.786426	8.278921	Nigeria
Schizachyrium delicatum	Stapf	K	John M. Fay	5914	8.5	21.21666667	Central African Republic
Schizachyrium djalonicum	Jacq.-F�l.	K	Jacques-Felix	7170	10.808	-12.545663	Guinea
Schizachyrium djalonicum	Jacq.-F�l.	K	R.R. Glanville	427	9.450729	-12.413261	Sierra Leone
Schizachyrium djalonicum	Jacq.-F�l.	K	Paul Jaeger	7714	8.787227	-11.132358	Sierra Leone	MH181227
Schizachyrium exile	(Hochst.) Pilg.	MO	Simon Laegaard, Sobere Traore	17872	16.55	13.666667	Senegal
Schizachyrium exile	(Hochst.) Pilg.	MO	S. Bidgood, K. Hoenselaar, G. Leliyo, K. Vollesen	5825	-6.4	31.31666667	Tanzania
Schizachyrium exile	(Hochst.) Pilg.	MO	A.J.M.. Leeuwenberg	10484	10.616667	13.23333333	Cameroon	MH181219
Schizachyrium exile	(Hochst.) Pilg.	MO	Traiperm, Norsaengsri, and Layton	566	18.92083333	98.90222222	Thailand
Schizachyrium fragile	(R. Br.) A. Camus	MO	Henk van der Werff	11529	-17.382781	145.276911	Australia
Schizachyrium fragile	(R. Br.) A. Camus	MO	R.W. Johnson	4538	-12.61666667	133.05	Australia
Schizachyrium fragile	(R. Br.) A. Camus	MO	Gordon McPherson	5537	-21.17972222	164.8783333	New Caledonia
Schizachyrium gaumeri (now det. as malacostachyum)		MO	Gerrit Davidse, Mario Sousa, O. Tellez, E. Martinez, J. Davidse	29953	16.06944444	-92.04194444	Mexico
Schizachyrium gaumeri	Nash	MO	D.E. Breedlove, G. Davidse	54294	16.80444444	-92.90222222	Mexico
Schizachyrium gaumeri	Nash	MO	Dennis Breedlove, Gerrit Davidse	55431	16.76055556	-92.96805556	Mexico
Schizachyrium gracilipes	(Hack.) A. Camus	K	Rosengurtt	8535	-31.53771	-55.701804	Uruguay
Schizachyrium gracilipes	(Hack.) A. Camus	K	Rosengurtt	8413	-30.893484	-55.567355	Uruguay
Schizachyrium gracilipes	(Hack.) A. Camus	K	B. Hatschbadh, J.C. Lindeman, J.H. de Haas	Ha 13788	-25.974604	-49.678588	Brazil
Schizachyrium gresicola	Jacq.-F�l.	K	Jacques-Felix	7171	10.808481	-12.545663	Guinea
Schizachyrium gresicola	Jacq.-F�l.	K	A. Pitat	n/a	13.731983	-5.413488	Mali
Schizachyrium gresicola	Jacq.-F�l.	K	R. Rose Innes	32712	6.768919	0.441197	Ghana
Schizachyrium jeffreysii	(Hack.) Stapf	MO	CA Mafeking; DI Field	2525	-25.65	25.1275	Botswana
Schizachyrium jeffreysii	(Hack.) Stapf	MO	R.M. Davies	1815	-20.9	30.68333333	Zimbabwe
Schizachyrium jeffreysii	(Hack.) Stapf	MO	H.M. Bregel	1074	-18.93944444	30.08166667	Zimbabwe
Schizachyrium jeffreysii	(Hack.) Stapf	MO	R. Pasquet	1204	-14.21889	23.92806	Zambia
Schizachyrium jeffreysii	(Hack.) Stapf	MO	R. Pasquet	1166	-8.82722	31.41083	Zambia
Schizachyrium jeffreysii	(Hack.) Stapf	MO	R. Pasquet	1175	-8.83056	31.38528	Zambia
Schizachyrium lomaense	A. Camus	K	A.M.B. Feika, I. Darbyshire, R. Clark , M.S. James	46	8.9925	-11.68444444	Sierra Leone	MH181201
Schizachyrium lomaense	A. Camus	K	S.O. Sokpo, Lucia Lopez Poveda, Kabbie M.T. Kanu	20	9.069166667	-11.6475	Sierra Leone
Schizachyrium lomaense	A. Camus	K	J.K. Morton	SL2666	9.197711	-11.116667	Sierra Leone
Schizachyrium maclaudii	(Jacq.-F�l.) S.T. Blake	MO	Tim Killeen	2606	-14.58333333	-66.5	Bolivia
Schizachyrium maclaudii	(Jacq.-F�l.) S.T. Blake	MO	J.G. Adam	25366	5.879722222	-10.03083333	Liberia
Schizachyrium maclaudii	(Jacq.-F�l.) S.T. Blake	MO	J.B. Hall	47037	5.288333333	-2.745277778	Ghana
Schizachyrium malacostachyum	(J. Presl) Nash	MO	D.E Breedlove, Gerrit Davidse	54413	16.157084	-92.803632	Mexico
Schizachyrium malacostachyum	(J. Presl) Nash	MO	A. Grijalva, M.V. de Grijalva	1832	12.17361111	-86.51111111	Nicaragua
Schizachyrium malacostachyum	(J. Presl) Nash	MO	B. Hammel, J.F. Morales	23418	10.87777778	-85.85805556	Costa Rica
Schizachyrium maritimum	(Chapm.) Nash	MO	Sidney McDaniel	7189	30.25277778	-87.65111111	US
Schizachyrium maritimum	(Chapm.) Nash	MO	S.M. Tracy	3986	30.23611111	-88.66555556	US
Schizachyrium maritimum	(Chapm.) Nash	MO	R.K. Godfrey	69278	29.81096059	-84.59417189	US
Schizachyrium microstachyum (aka condensatum)	(Desv. ex Ham.) Roseng., B.R. Arrill. & Izag.	MO	A Lliully, M. Serrano, J. Villalobos	191	-22.5227778	-64.3977778	Bolivia	MH181234
Schizachyrium microstachyum (aka condensatum)	(Desv. ex Ham.) Roseng., B.R. Arrill. & Izag.	MO	Kendall Lee	39	15.36805556	-61.35222222	Dominica
Schizachyrium microstachyum (aka condensatum)	(Desv. ex Ham.) Roseng., B.R. Arrill. & Izag.	MO	Gerardo Borjas	77	14.5425	-86.73305556	Honduras
Schizachyrium microstachyum (aka condensatum)	(Desv. ex Ham.) Roseng., B.R. Arrill. & Izag.	MO	E. Kellogg	306269	-31.420083	-64.188776	Argentina	MH181233
Schizachyrium nodulosum	(Hack.) Stapf	K	R. Rose Innes	30470 or 714	9.85	0.15	Ghana
Schizachyrium nodulosum	(Hack.) Stapf	K	Scholz	81	10.2	-4.766667	Burkina Faso
Schizachyrium nodulosum	(Hack.) Stapf	K	M. Saadou	1514	13.346835	2.31743	Niger
Schizachyrium pachyarthron	C. A. Gardner	MO	S.T. Blake	17764	-16.63333333	135.85	Australia
Schizachyrium pachyarthron	C. A. Gardner	MO	J.C. Tothill	n/a	-12.61833333	141.8902778	Australia
Schizachyrium pachyarthron	C. A. Gardner	MO	J.C. Tothill	103	-12.65138889	141.86	Australia
Schizachyrium platyphyllum	(Franch.) Stapf	MO	Jacques-Georges Adam	7020	9.262222222	-9.001944444	Guinea
Schizachyrium platyphyllum	(Franch.) Stapf	MO	L. Festo, W. Bayona	1744	-1.038888889	31.53166667	Tanzania
Schizachyrium platyphyllum	(Franch.) Stapf	MO	A.J.M. Leeuwenberg	8714	5.283333333	9.983333333	Cameroon
Schizachyrium pulchellum	(D. Don ex Hook.) Stapf	K	K. Guilavogui, C. Couch, L. Lopez Poveda, F. Fofana	672	10.63549087	-14.59301131	Guinea
Schizachyrium pulchellum	(D. Don ex Hook.) Stapf	K	H.G. Stubbings	11	6.396577	3.388539	Nigeria
Schizachyrium pulchellum	(D. Don ex Hook.) Stapf	K	J.L.C.H. van Valkenburg	2507	-1.338611111	9.022222222	Gabon
Schizachyrium ruderale	Clayton	K	R. Rose Innes	31428 or 1967	10.45	0.433333333	Ghana
Schizachyrium ruderale	Clayton	K	R. Rose Innes	30476 or 732	9.966666667	0.15	Ghana
Schizachyrium ruderale	Clayton	K	R. Rose Innes	30281 or 444	10.85	-1.35	Gold Coast
Schizachyrium rupestre	(K. Schum.) Stapf	MO	John M. Fay	5888	8.5	21.216667	Central African Republic
Schizachyrium rupestre	(K. Schum.) Stapf	MO	J.G. Adam	24260	7.589166667	-8.5125	Liberia
Schizachyrium rupestre	(K. Schum.) Stapf	MO	J. Raynal, A. Raynal	6448	14.9	-17.11666667	Senegal
Schizachyrium salzmannii	(Trin. ex Steud.) Nash	MO	E. Zardini, R. Valezquez	25831	-25.21666667	-55.91666667	Paraquay	MH181208
Schizachyrium salzmannii	(Trin. ex Steud.) Nash	MO	T. Rojas	13525	-25.5	-57.01666667	Paraquay
Schizachyrium salzmannii	(Trin. ex Steud.) Nash	MO	M. Nee, I. Vargas C.	43415	-18.18333333	-63.88333333	Bolivia
Schizachyrium sanguineum	(Retz.) Alston	MO	Esther Sanchez Garcia, Guadalupe Cornejo Tenorio, Guillermo Ibarra Manriquez	430	19.61444444	-101.3763889	Mexico
Schizachyrium sanguineum	(Retz.) Alston	MO	P.A. Smith	3824	-18.15166667	23.23333333	Botswana
Schizachyrium sanguineum	(Retz.) Alston	MO	Liz Makings, Danika Setaro	3834	31.48388889	-110.3286111	US
Schizachyrium sanguineum	(Retz.) Alston	MO	Traiperm, et al.	592	17.73111111	102.3547222	Thailand
Schizachyrium sanguineum	(Retz.) Alston	MO	R. Pasquet	1167	-8.82694	31.41306	Zambia
Schizachyrium sanguineum	(Retz.) Alston	MO	R. Pasquet	1177	-8.93333	31.2175	Zambia
Schizachyrium scabriflorum	(Rupr. ex Hack.) A. Camus	MO	M. C. Peichoto	136	-27.69944444	-55.66333333	Argentina
Schizachyrium scabriflorum	(Rupr. ex Hack.) A. Camus	MO	Tim Killeen	1619	-16.13333333	-62.08333333	Bolivia
Schizachyrium scabriflorum	(Rupr. ex Hack.) A. Camus	MO	Tim Killeen	1829	-16.41666667	-62	Bolivia
Schizachyrium schweinfurthi	(Hack.) Stapf	K	D. Clayton	D.C. 389	5.689991	0.056664	Gold Coast
Schizachyrium schweinfurthi	(Hack.) Stapf	K	J.O. Ankrah	20158 or 250 or 43	5.666666667	-0.1	Gold Coast
Schizachyrium schweinfurthi	(Hack.) Stapf	K	S.O. Magaji	Mg 248	7.553994	6.228897	Nigeria
Schizachyrium scintillans	Stapf	K	W.R.Q. Luke, S. Sanogo	15899	14.652411	-11.454096	Mali
Schizachyrium scintillans	Stapf	K	T.S. Jones	380	8.341394	-13.197927	Sierra Leone
Schizachyrium scintillans	Stapf	K	J.G. Adam	12746	11.303175	-12.309102	Guinea
Schizachyrium scoparium	(Michx.) Nash	MO	R. Dale Thomas, Eric Sundell, Carl Amason	108097	33.27333333	-92.58138889	US	MF170217
Schizachyrium scoparium	(Michx.) Nash	MO	S Hudson	244	36.67916667	-90.54638889	US
Schizachyrium scoparium	(Michx.) Nash	MO	R. Torres C., P. Tenorio L.	3678	26.884411	-107.671709	Mexico
Schizachyrium spicatum	(Spreng.) Herter	MO	Elsa Matilde Zardini, Tulio Tilleria	38574	-26.58333333	-57.1	Paraguay	MH181207
Schizachyrium spicatum	(Spreng.) Herter	MO	C. Peichoto, V. Solis Neffa, G. Seijo, M. Sosa	47	-34.69444444	-56.77111111	Argentina	MH181209
Schizachyrium spicatum	(Spreng.) Herter	MO	E. Zardini, E. Velazquez	20815	-25.15	-57.5	Paraguay
Schizachyrium stoloniferum	Nash	MO	Steve L. Orzell, Edwin L. Bridges	20879	30.57472222	-87.36916667	US
Schizachyrium stoloniferum	Nash	MO	R.K. Godfrey	74596	30.338811	-84.427687	US
Schizachyrium stoloniferum	Nash	MO	Agnes Chase	271	29.633604	-82.312748	US
Schizachyrium sulcatum	(Ekman) S.T. Blake	K	S.A. Renvoize	5421	4.395452	-71.409205	Colombia
Schizachyrium sulcatum	(Ekman) S.T. Blake	K	R. Hasse	H 145	-13.08472222	-67.25	Boliva
Schizachyrium sulcatum	(Ekman) S.T. Blake	K	H.S. Irwin, J.W. Grear, Jr., R. Souza, R. Reis dos Santos	16096	-12.67957	-52.65134	Brazil
Schizachyrium tenerum	Nees	MO	P.M. Peterson, M.S. Gonzalez-Elizondo	15988	22.62833333	-104.1802778	Mexico
Schizachyrium tenerum	Nees	MO	T. Rojas	13182A	-26.21666667	-57.2	Paraguay
Schizachyrium tenerum	Nees	MO	Paul Mckenzie	187	24.66027778	-81.26638889	US
Schizachyrium thollonii	(Franch.) Stapf	K	L. Liben	3613	-6.269429	23.413243	Democratic Republic of Congo
Schizachyrium thollonii	(Franch.) Stapf	K	R. Compire	1408	1.057158	18.4608444	Democratic Republic of Congo
Schizachyrium thollonii	(Franch.) Stapf	K	John M. Fay	4042	8.483333333	21.3	Central African Republic
Schizachyrium thollonii	(Franch.) Stapf	MO	R. Pasquet	1260	-11.5044444	24.37944444	Zambia
Schizachyrium thollonii	(Franch.) Stapf	MO	R. Pasquet	1263	-13.55194444	26.66972222	Zambia	MH181189
Schizachyrium ursulus	Stapf	MO	G. Davidse	5987	-25.76138889	28.5325	South Africa
Schizachyrium ursulus	Stapf	MO	G. Davidse, W.L. Handlos	7264	-13.15361111	30.70361111	Zambia	MH181183
Schizachyrium ursulus	Stapf	MO	J.B. Phipps, L.D.E.F. Vessy-Fitzgerald	2975	-12.80111111	30.90972222	Zambia
Schizachyrium yangambiensis	Germain	K	L. Leonard	1817	0.758623	24.463746	Democratic Republic of Congo
Schizachyrium yangambiensis	Germain	K	Taton	1483	2.096502	30.601451	Democratic Republic of Congo
Schizachyrium yangambiensis	Germain	K	Jean Louis	16218	0.825348	24.452767	Democratic Republic of Congo
Bothriochloa decipiens (outgroup - not in DASH clade)	(Hack.) C. E. Hubb.				-18.556	146.3093	Australia
